# Supplementary material for: MicroRNA-1246 expression associated with CCNG2-mediated chemoresistance and stemness in pancreatic cancer
Source: PubMed Central journal article supplement — Br J Cancer. 2014 Aug 12;111(8):1572–80. doi: 10.1038/bjc.2014.454 (PMC4200094; doi:10.1038/bjc.2014.454), 2014-08-12
Supplement: bjc2014454x2.pdf [file bjc2014454x2.pdf]

A

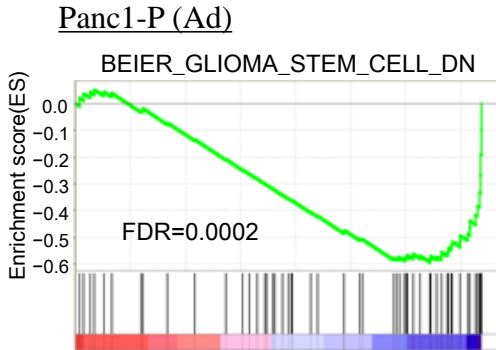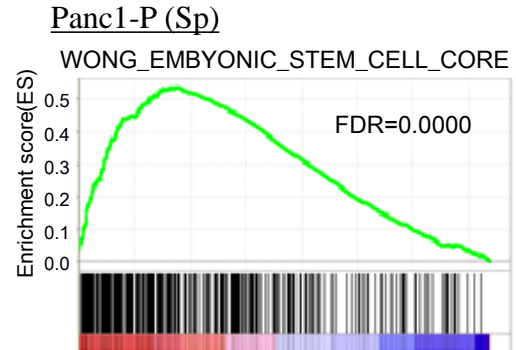

B

| Gene set                                         | Related Phenotype | Size | NES   | FDR q-value |
|--------------------------------------------------|-------------------|------|-------|-------------|
| <b>Gene sets enriched in Panc1-P (Sp) cells.</b> |                   |      |       |             |
| WONG_EMBRYONIC_STEM_CELL_CORE                    | Stem cell         | 307  | 2.5   | 0           |
| RAMALHO_STEMNESS_UP                              | Stem cell         | 189  | 2.19  | 0.0001      |
| <b>Gene sets enriched in Panc1-P cells.</b>      |                   |      |       |             |
| BEIER_GLIOMA_STEM_CELL_DN                        | Stem cell         | 59   | -2.10 | 0.0002      |
| BOQUEST_STEM_CELL_DN                             | Stem cell         | 177  | -1.96 | 0.0018      |
