# Supplementary figures and images for: MicroRNA-1246 expression associated with CCNG2-mediated chemoresistance and stemness in pancreatic cancer
Source: PubMed Central journal article supplement — Br J Cancer. 2014 Aug 12;111(8):1572–80. doi: 10.1038/bjc.2014.454 (PMC4200094; doi:10.1038/bjc.2014.454), 2014-08-12

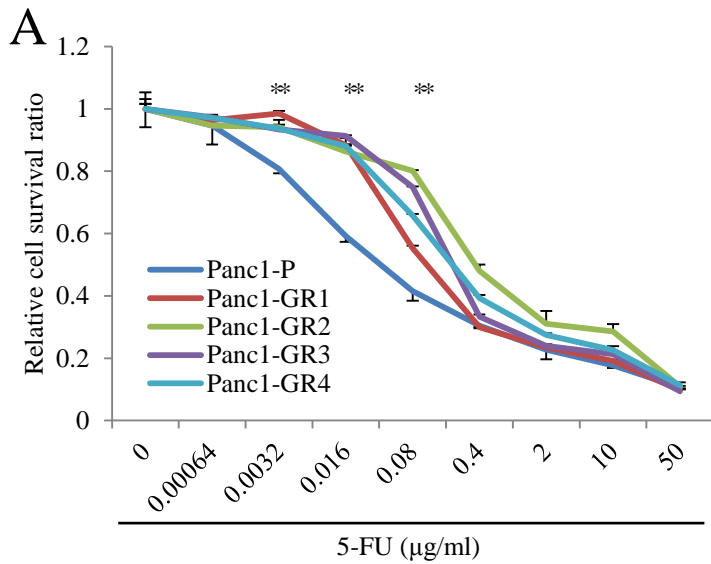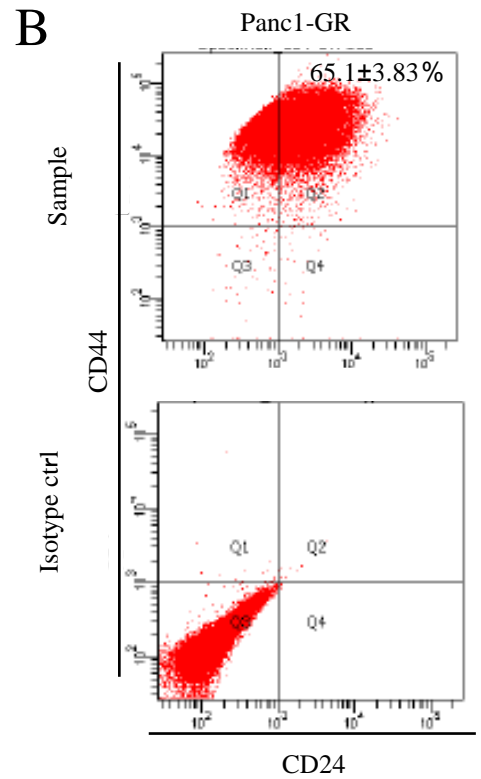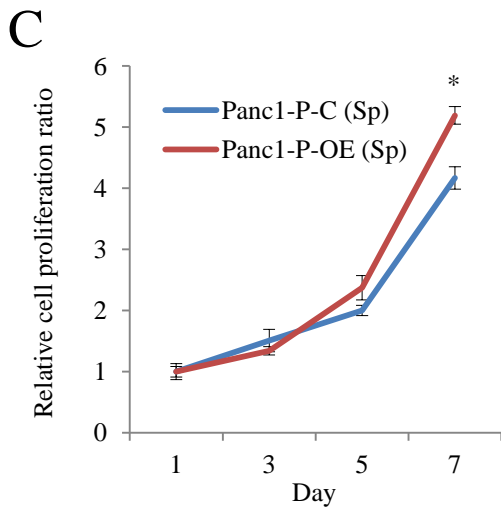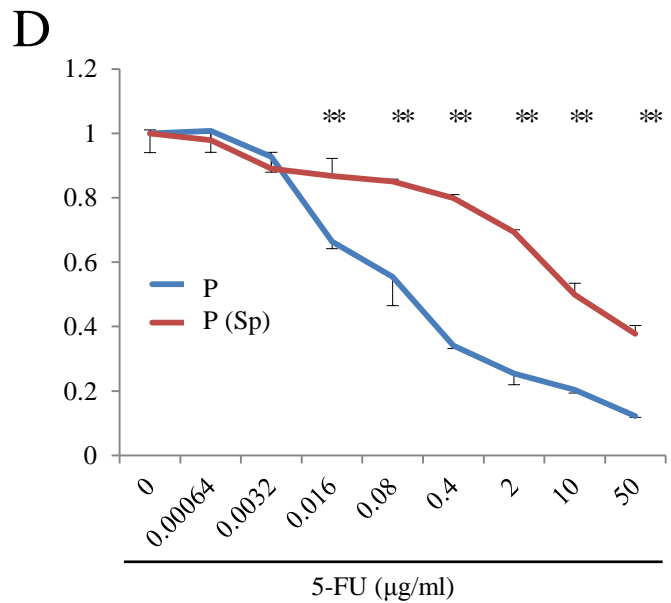

Supplement: bjc2014454x1.pdf [file bjc2014454x1.pdf]

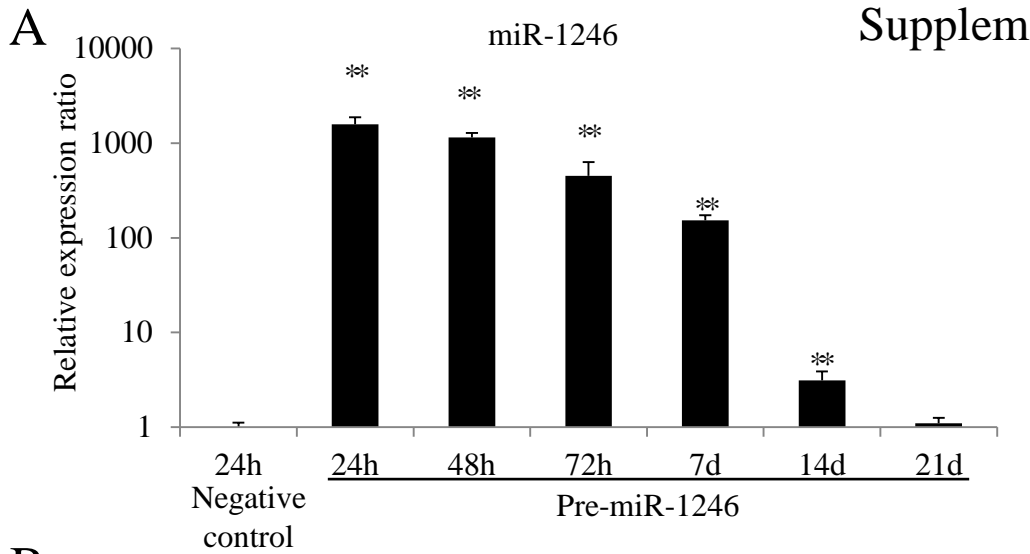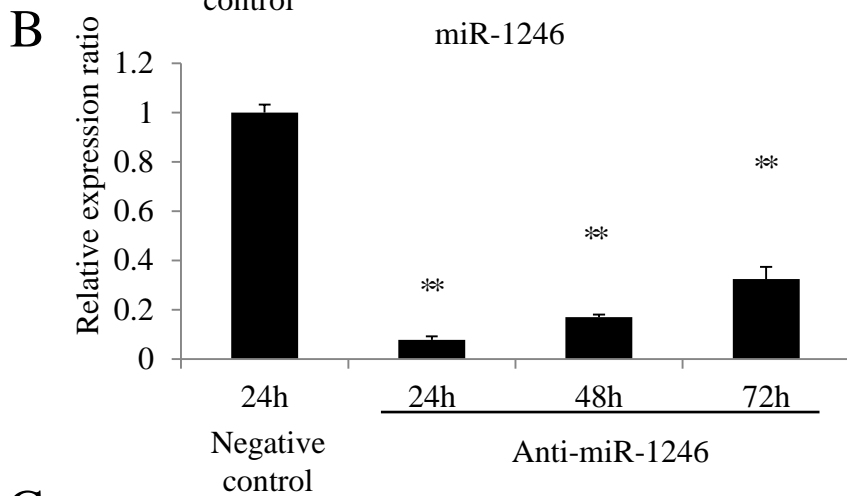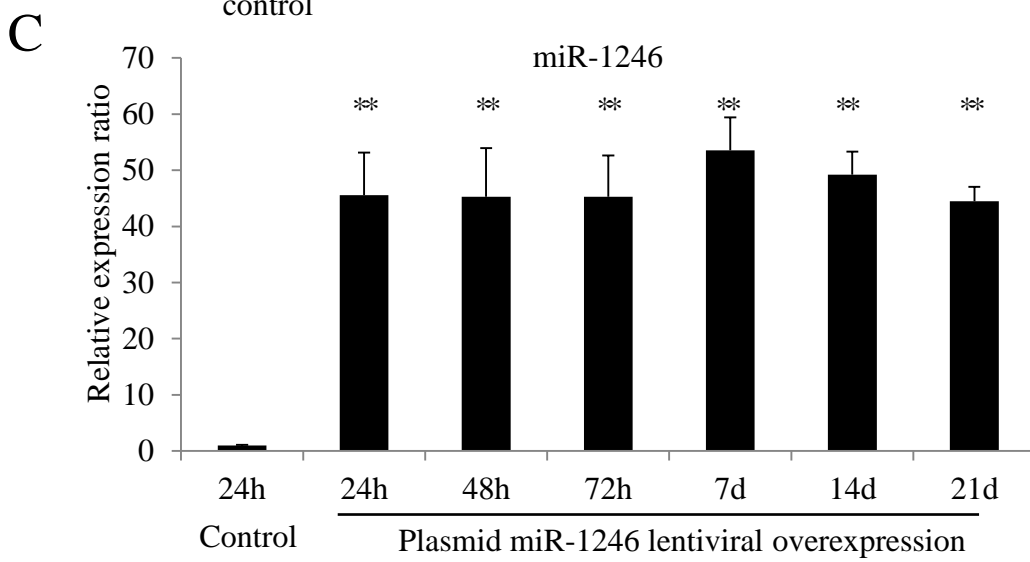

Supplement: bjc2014454x3.pdf [file bjc2014454x3.pdf]

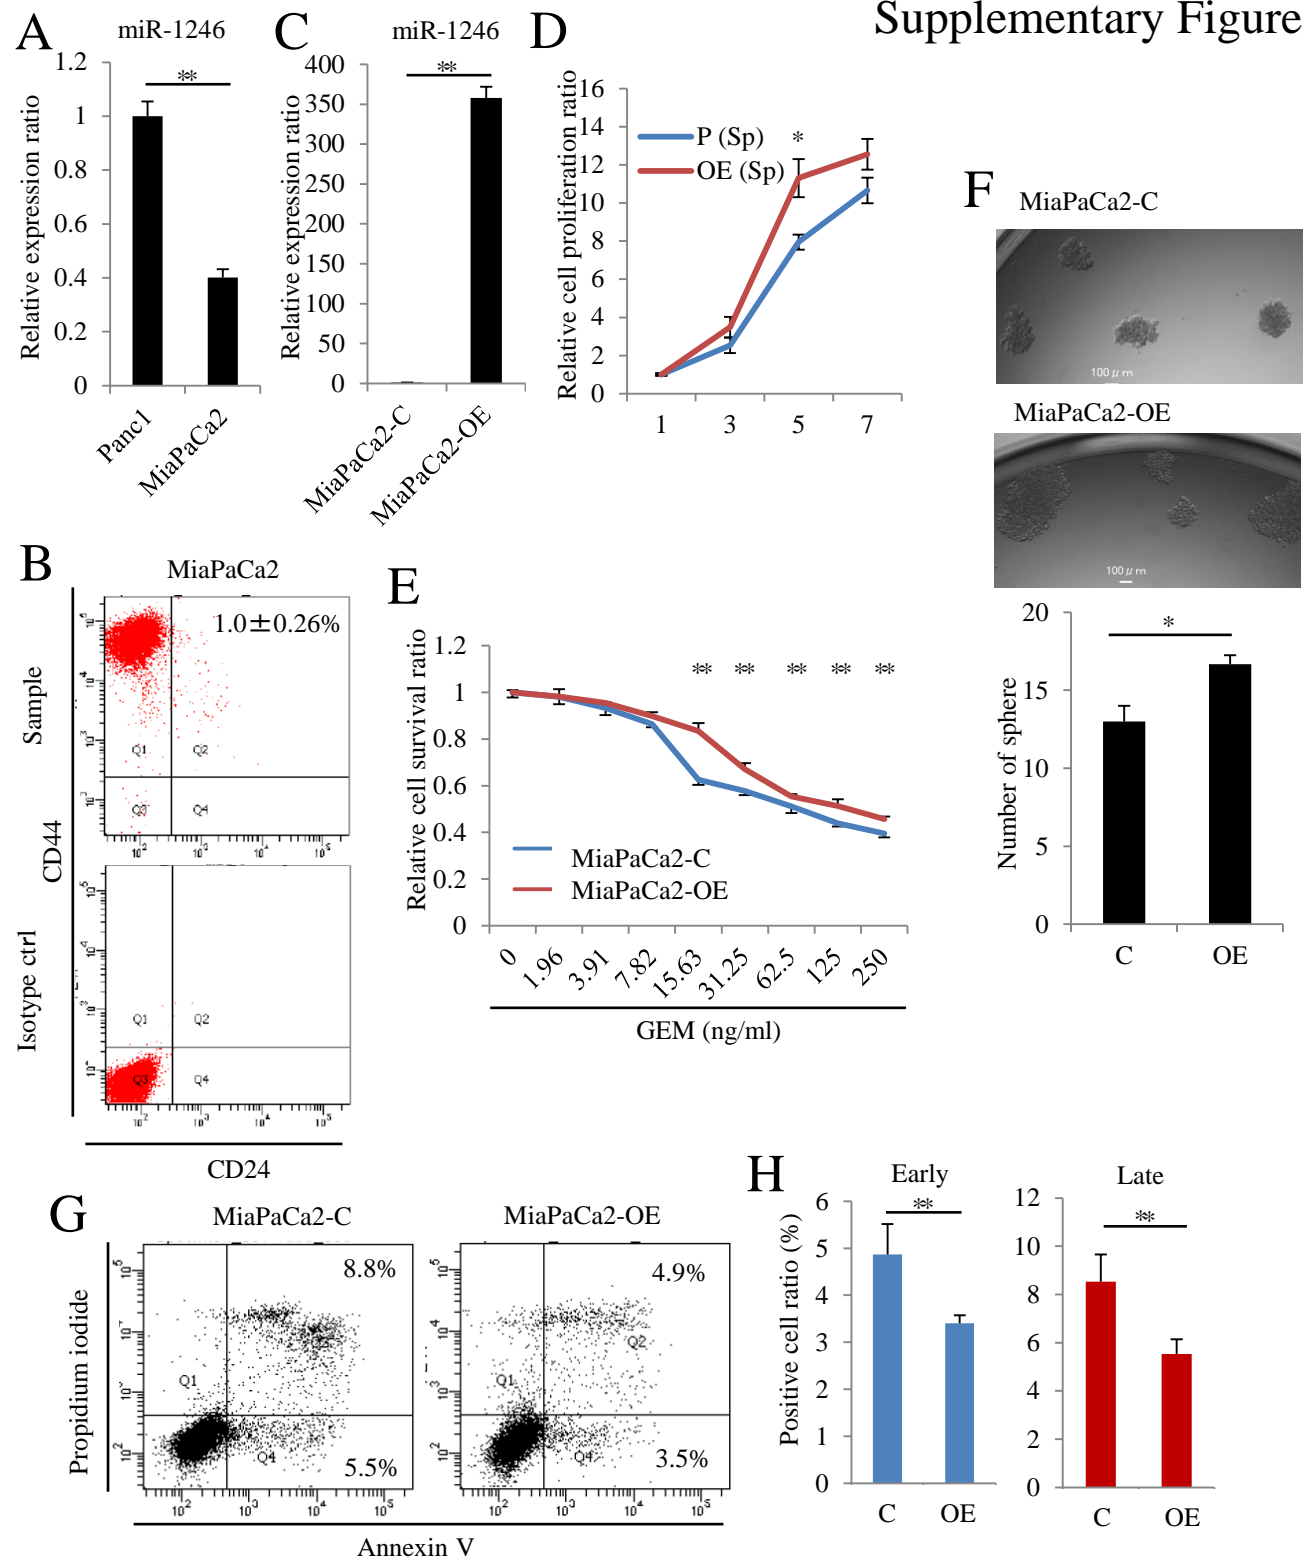

Supplement: bjc2014454x4.pdf [file bjc2014454x4.pdf]

A

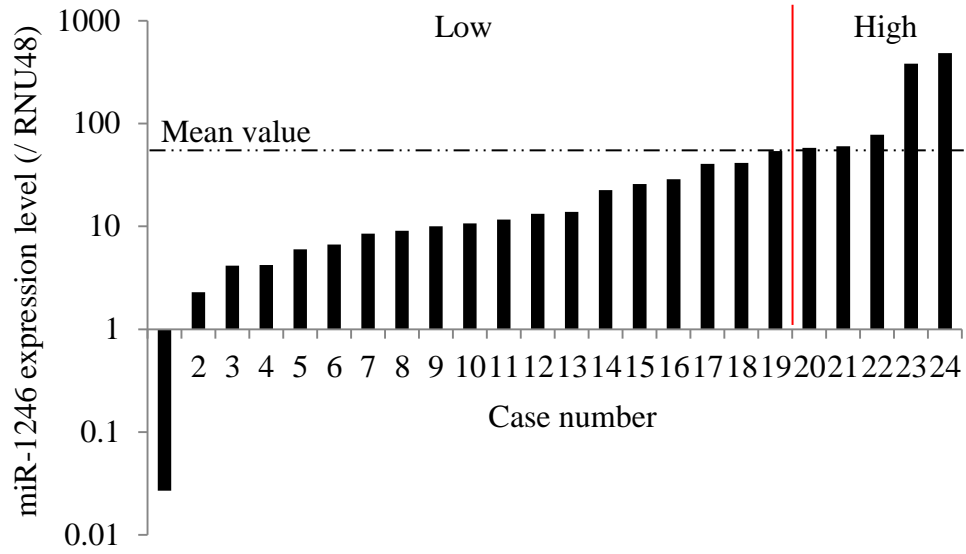

B

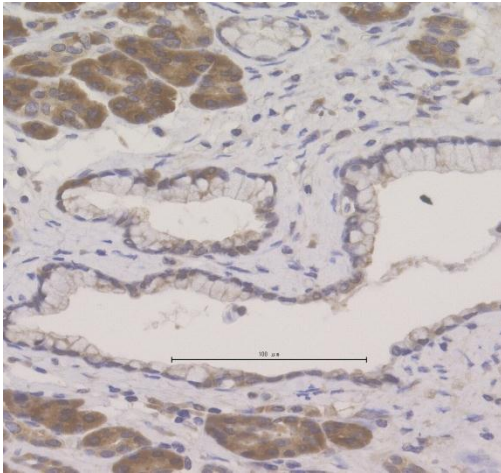

C

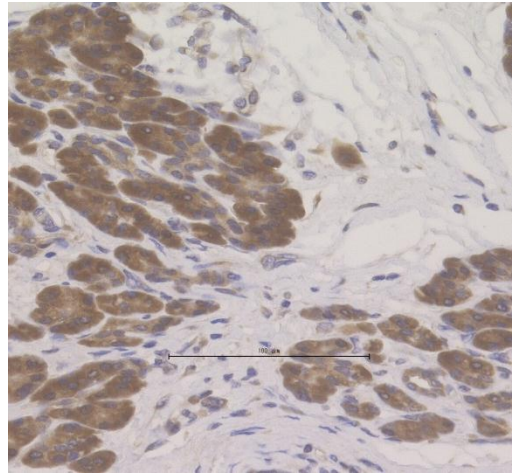

Supplement: bjc2014454x5.pdf [file bjc2014454x5.pdf]
